# Supplementary material for: Alice im digitalen Wunderland: pädiatrische Lehre in der COVID-19-Pandemie
Source: Springer Nature journal article supplement (doi:10.1007/s00112-020-01076-7), 2020-12-02
Supplement: MOESM1 [file 18649940]

**Tabelle 1: Freitextkommentare zu Vorlesungen**

| Thema                                | Was war gelungen/förderlich (n=20)                                                                                                                                                    | Was war nicht gelungen/schwierig (n=22)                                                                                                                                                                                     | Empfehlungen (n=18)                                                                                                                                                                                                                                                                                       |
|--------------------------------------|---------------------------------------------------------------------------------------------------------------------------------------------------------------------------------------|-----------------------------------------------------------------------------------------------------------------------------------------------------------------------------------------------------------------------------|-----------------------------------------------------------------------------------------------------------------------------------------------------------------------------------------------------------------------------------------------------------------------------------------------------------|
| Technik per se                       | Technikausstattung gut (3/3)                                                                                                                                                          | Probleme mit Hard- und / oder Software (7/7)<br>Fehlender Live-Stream (1/1)                                                                                                                                                 | Technische Ausstattung bzw. Support verbessern (3/3)                                                                                                                                                                                                                                                      |
| Technische / Zentrale Unterstützung  | Guter technischer Support (6/6)                                                                                                                                                       | Fehlende technischer Support (5/5)                                                                                                                                                                                          | Technischen Support allgemein (2/2) bzw. bei Erstellung Videos verbessern (1/1)                                                                                                                                                                                                                           |
| Organisation                         | Videos zum Selbststudium: Größerer Nutzerkreis als bei Online-Vorlesungen (2/2)                                                                                                       | Probleme Copyright (1/1)<br>Probleme Datenschutz (1/1)<br>Probleme Studierende zu Veranstaltungen einzuladen (1/1)                                                                                                          | Lernplan, um Kumulation am Semesterende zu vermeiden (1/1)<br>Soviel Präsenzvorlesung wie möglich einrichten (1/1).                                                                                                                                                                                       |
| Dozentinnen/Dozenten                 | Hohes Engagement einiger Dozierender (1/1)<br>Dozentinnen/ Dozenten zufrieden (1/1)                                                                                                   | Dozentinnen/Dozenten mit neuen Formaten sehr gefordert (1/1)<br>Dozentinnen/Dozenten unzufrieden (1/1)                                                                                                                      | Schulungen didaktisch / technisch für Dozentinnen/Dozenten (3/3) und Studierende (1/1).<br>Hohen Vorbereitungsanfang bedenken (1/1)                                                                                                                                                                       |
| Gestaltung Unterricht                | Online-Vorlesungen, (2/2)<br>Vorlesungsvideos für Selbststudium, (4/4)<br>Online-Vorlesungen für zusätzliches Selbststudium aufgenommen<br>Inhalte auf wesentliches komprimiert (1/1) | Fehlen von Patientinnen/Patienten (2/2)<br>Vorlesungsvideos schlechter als Online-Vorlesungen (1/1) bzw. umgekehrt (1/1)<br>Hochgeladene Inhalte zu umfangreich (1/1), zu unstrukturiert (1/1) oder zu spät verfügbar (1/1) | Online-Vorlesungen sinnvoll (8/8).<br>Verbesserbar durch Präsenz einiger Studierender (1/1), parallele Aufzeichnung für Selbststudium (2/2), sowie didaktische Weiterentwicklung (1/1). Videocasts verbessern durch begleitende Online-Seminare (2/2), Präsenzunterricht (1/1) und Diskussionsforen (1/1) |
| Zufriedenheit Studierende            | Zufriedenheit gut (9/9)                                                                                                                                                               |                                                                                                                                                                                                                             |                                                                                                                                                                                                                                                                                                           |
| Interaktion Dozierende / Studierende | Dozentin/Dozent via Chat (2/2) oder Fragestunde (1/1) für Rückfragen erreichbar                                                                                                       | Fehlende Interaktion Studierende mit Dozentinnen/Dozenten (5/5)<br>Dozierende untereinander (1/1)                                                                                                                           | Kontakt zu Studierenden allgemein erhalten bzw. verbessern (2/2)                                                                                                                                                                                                                                          |
| Lernerfolg                           | Lernerfolg gut (4/4)                                                                                                                                                                  | Keine Kontrolle von Lernerfolg möglich (1/1)<br>Lernerfolg schlecht (1/1)                                                                                                                                                   |                                                                                                                                                                                                                                                                                                           |
| Teilnahme                            | Gut (1/1)                                                                                                                                                                             | Fehlende Kontrolle (1/1)                                                                                                                                                                                                    |                                                                                                                                                                                                                                                                                                           |

**Tabelle 2: Freitextkommentare zu Seminaren**

| Thema                      | Was war gelungen/förderlich (n=20)                                                                                                                                                         | Was war nicht gelungen/schwierig (n=18)                                                                                                                               | Empfehlungen (n=14)                                                                                                                                                          |
|----------------------------|--------------------------------------------------------------------------------------------------------------------------------------------------------------------------------------------|-----------------------------------------------------------------------------------------------------------------------------------------------------------------------|------------------------------------------------------------------------------------------------------------------------------------------------------------------------------|
| Technik                    | Einfach technisch umsetzbar (2/6)<br>Stabiles Internet, Datenrate (1/2)<br>Zentrale Unterstützung (4/6)                                                                                    | Technische Ausstattung/Umsetzung (4/6)<br>Internet, Datenrate (1/2)<br>Zentrale Unterstützung (2/6)<br>Hoher Schulungsaufwand (Digitale Lehrerfahrung sinnvoll) (3/3) | Verbesserung der Technik und Support (3/3)<br>Beherrschung der Technik und Software, um alle Funktionalitäten nutzen zu können (1/1)                                         |
| Organisation               |                                                                                                                                                                                            | Akkumulation am Semesterende (1/1)<br>Hoher Organisationsaufwand (2/2)<br>Zu hohe Belastung der Lehrkoordinatoren (1/1)                                               | Hilfe durch studentische Tutoren (1/1)                                                                                                                                       |
| Dozentinnen/Dozenten       | Großes Engagement (1/2)                                                                                                                                                                    | Fehlende didaktische Fertigkeiten (1/2)                                                                                                                               | Freistellung für Lehre (1/1)                                                                                                                                                 |
| Gestaltung des Unterrichts | Interaktiver Unterricht (3/6)<br>Diskussionsmöglichkeit (4/4)<br>Multimediale Materialien, Lehrvideos, Videocasts (2/2)<br>Interdisziplinär (1/1)<br>Fallvignetten (2/2)<br>Webinare (1/1) | Fehlende Interaktion (3/6)<br>Fehlende Selbstlernphase (3/3)<br>Praktischer Unterricht sehr erschwert (1/1)                                                           | Begleitende Webinare (2/2)<br>Videocasts (1/1)<br>Mehr Interaktion (1/1)<br>Regelmäßige Online-Fragestunden (1/1)<br>Kombination Selbstlernphase und Online-Unterricht (2/2) |
| Gruppengröße               | Kleine Gruppen (1/1)                                                                                                                                                                       | Große Gruppengröße (1/1)                                                                                                                                              | Kleinere Gruppengröße (2/2)                                                                                                                                                  |
| Zufriedenheit              | Generelle Zufriedenheit (5/5)<br>Hohe Akzeptanz (2/2)<br>Positive Evaluation (1/1)                                                                                                         | Fehlendes Vorwissen (2/2)<br>Geringe Teilnahmequote (1/1)                                                                                                             |                                                                                                                                                                              |
| Prüfung                    |                                                                                                                                                                                            | Freitextaufgaben zu zeitaufwendig (1/1)                                                                                                                               |                                                                                                                                                                              |
| Lernerfolg                 | Lernerfolg bei der Bearbeitung von Fällen hoch (3/3)                                                                                                                                       |                                                                                                                                                                       |                                                                                                                                                                              |
| Teilnahme                  |                                                                                                                                                                                            | Kontrolle der Teilnahme sehr schwierig (1/1)                                                                                                                          | Videos der Studierenden sollen eingeschaltet sein (1/1)                                                                                                                      |

**Tabelle 3: Freitextkommentare zu Unterricht am Patienten**

| Thema                      | Was war gelungen / förderlich (n=16)                                                                                                                                                                                                                                                                                                                     | Was war nicht gelungen / schwierig (n=19)                                                                                                                                                                              | Empfehlungen (n=14)                                                                                                                              |
|----------------------------|----------------------------------------------------------------------------------------------------------------------------------------------------------------------------------------------------------------------------------------------------------------------------------------------------------------------------------------------------------|------------------------------------------------------------------------------------------------------------------------------------------------------------------------------------------------------------------------|--------------------------------------------------------------------------------------------------------------------------------------------------|
| Technik                    | Gute Technik (1/4)                                                                                                                                                                                                                                                                                                                                       | Technische Probleme (3/4), fehlendes Equipment                                                                                                                                                                         | Ausbau Technik (2)                                                                                                                               |
| Organisation               |                                                                                                                                                                                                                                                                                                                                                          | Vorbereitungszeit und hoher Aufwand (2/2); Aufteilung zwischen Disziplinen, Datenschutz bei Online-Unterricht am Patienten                                                                                             | Datenschutzfragen klären; Institutsübergreifende Datenbanken und Materialsammlungen schaffen; Finanzielle Ressourcen erhöhen; Didaktikschulungen |
| Gestaltung des Unterrichts | Jede Form einer doch gelingenden Präsenz-Lehre (4/4), zT mit vorheriger SarsCOV2-Testung<br>Neue Formate: interaktive Fallvignetten, Beschreibung einer körperlichen Untersuchung durch Studierende, Unterricht am Krankenblatt, Kurzvideos<br>Best practice: Kurzvideos „Corona TV – Pädiatrie in 90 Sekunden“<br>Live-online-Begleitung durch Webinare | UaP in Präsenz im Grunde nicht ersetzbar (8); (weitere 2 gleiche Kommentare bei Frage 3.1)<br>Schauspielpatientinnen und -patienten erreichen nicht Lernerfolg und Lernzufriedenheit von echten Patientinnen/Patienten | konventioneller UaP in Präsenz nicht ersetzbar (6)<br>Ggfs. vorherige SarsCOV2-Testung Studierende                                               |
| Zufriedenheit              | Zufriedenheit gut in 5/5                                                                                                                                                                                                                                                                                                                                 | Studentisches Feedback fehlt                                                                                                                                                                                           |                                                                                                                                                  |
| Teilnahme                  |                                                                                                                                                                                                                                                                                                                                                          | Keine rege Nutzung von Online-Materialien                                                                                                                                                                              |                                                                                                                                                  |

**Tabelle 4a: Freitextkommentare zu Simulations-/Fertigkeitstraining**

| Thema                                   | Was war gelungen / förderlich (n=7)                                                                                                                    | Was war nicht gelungen / schwierig (n=7)                                                                                                                                          | Empfehlungen (n=9)                                                                                                                                                                                                                                                                                                                                                                               |
|-----------------------------------------|--------------------------------------------------------------------------------------------------------------------------------------------------------|-----------------------------------------------------------------------------------------------------------------------------------------------------------------------------------|--------------------------------------------------------------------------------------------------------------------------------------------------------------------------------------------------------------------------------------------------------------------------------------------------------------------------------------------------------------------------------------------------|
| Technik/Ausstattung mit Lehrmaterialien | Zentrale Unterstützung (1/2)                                                                                                                           | Unzureichende Ausstattung mit Lehrmaterialien (1/2)                                                                                                                               | Kann grundsätzlich nicht digital durchgeführt werden (1/1)                                                                                                                                                                                                                                                                                                                                       |
| Organisation                            |                                                                                                                                                        | Zu knappe Planungszeit (1)<br>Ausgefallen (2)                                                                                                                                     |                                                                                                                                                                                                                                                                                                                                                                                                  |
| Gestaltung des Unterrichts              | Neue Videos erstellt (1/2)<br>einheitliches Lehrkonzept entwickelt (1/1)<br><br>Einsatz von Videos, um Interaktion in der Kleingruppe zu fördern (1/1) | Hoher Aufwand in Vorbereitung (1/2)<br>Unterricht an Simulationspuppen kann nicht digital abgebildet werden (1/1)<br>Fehlende direkte Lernkontrolle bei Üben der Fertigkeit (1/1) | Erstellen von mehr Videos sinnvoll (2)<br>Interaktive Online-Videos mit Fragen sind unterstützend sinnvoll (1)<br>Untersuchung von Kleinkind und Säugling nur in Real-Präsenz vermittelbar (1)<br>Zentrale Datenbank der DGKJ wünschenswert (1)<br>Begleitende web-Seminare (2)<br>Videocasts (2)<br>Kombination Selbstlernphase und Online-Unterricht + Präsenz-Training in kleinen Gruppen (1) |
| Zufriedenheit                           | Generelle Zufriedenheit (3/4)                                                                                                                          | Generelle Unzufriedenheit (1/4)                                                                                                                                                   | Keine positive Empfehlung möglich (1)                                                                                                                                                                                                                                                                                                                                                            |
| Lernerfolg/Lehrqualität                 | Verbesserter Lernerfolg u.a. durch konsistentes Konzept (1/2)<br>Lernerfolg hoch (1/5)                                                                 | Lernerfolg stark abhängig von Motivation der Kleingruppe (1/2)<br>Lernerfolg durch fehlenden Präsenz-Unterricht sehr ungenügend (4/5)                                             | Kann in Bezug auf den angestrebten Lernerfolg nicht/kaum digital durchgeführt werden, muss in Präsenz erfolgen, Präsenz nicht ersetzbar (4)                                                                                                                                                                                                                                                      |

**Tabelle 4b: Freitextkommentare zu Kommunikationstraining**

| Thema                                   | Was war gelungen / förderlich (n=7)                                                                                                                                  | Was war nicht gelungen / schwierig (n=7)                                                                                                                                                                                      | Empfehlungen (n=7)                                                                                                                                      |
|-----------------------------------------|----------------------------------------------------------------------------------------------------------------------------------------------------------------------|-------------------------------------------------------------------------------------------------------------------------------------------------------------------------------------------------------------------------------|---------------------------------------------------------------------------------------------------------------------------------------------------------|
| Technik/Ausstattung mit Lehrmaterialien |                                                                                                                                                                      | Technische Umsetzung sehr schwierig, deshalb darauf verzichtet (1/1)                                                                                                                                                          |                                                                                                                                                         |
| Organisation                            | konkreter Ablaufplan sehr gut trotz kurzfristiger Information durch Fakultät (1/2)                                                                                   | Sehr kurzfristige Info zum Ablauf (1/2)<br><br>Ausgefallen (2)                                                                                                                                                                | Präsenz-Unterricht bei ausreichend großem Raum und kleiner Gruppengröße doch möglich (1)<br>Frühzeitig planen (1)                                       |
| Dozentinnen/Dozenten                    | Hohe Bereitschaft zum Engagement (1/2)                                                                                                                               | Engagement eingeschränkt durch zu wenig Zeit und unzureichende Ressourcen (1/2)                                                                                                                                               |                                                                                                                                                         |
| Gestaltung des Unterrichts              | Zum Thema „Anamnese“ Nutzung von Fallvignetten als Ersatz für Videos (1/2)<br><br>Simulation einer Videokonferenz/-Sprechstunde mit Patientinnen und Patienten (1/1) | Verzicht auf Videos mit Schauspielpatientinnen und -patienten, da zu hoher Zeitaufwand und Feedbackrunde/Selbstreflexion nicht umsetzbar (1/2)<br><br>Nur sehr kleiner Teil des üblichen Kommunikationstraining möglich (1/1) | Mehr Videos geplant, insbesondere zu Fallpräsentation, Patientenübergabe, Kommunikation mit Eltern (1)<br>Kommunikation im Präsenzbetrieb notwendig (1) |
| Gruppengröße                            |                                                                                                                                                                      |                                                                                                                                                                                                                               | Max. 8 Stud. pro Gruppe (1)                                                                                                                             |
| Zufriedenheit                           | Zufriedenheit groß (2/2)                                                                                                                                             |                                                                                                                                                                                                                               | Keine positive Empfehlung möglich (1)                                                                                                                   |
| Lernerfolg/Lehr-Qualität                | Erstaunlich hoher Lernerfolg (1/2)<br>Video-Konferenz mit Patientinnen/Patienten sehr gut (1/1)                                                                      | Geringer Lernerfolg (1/2)<br>Geringere Authentizität (1/1)                                                                                                                                                                    | Muss in Präsenz erfolgen/nicht ersetzbar (1)                                                                                                            |
| Teilnahme der Studierenden              |                                                                                                                                                                      | Sehr gering, da keine Pflichtveranstaltung (1/1)                                                                                                                                                                              | Pflichtteilnahme notwendig wegen schlechter Akzeptanz (auch vor Corona) (1)                                                                             |
